# Supplementary material
Source: PubMed Central journal article supplement (PMC7443929)
Supplement: pnas.2005052117.sapp.pdf [file pnas.2005052117.sapp.pdf]

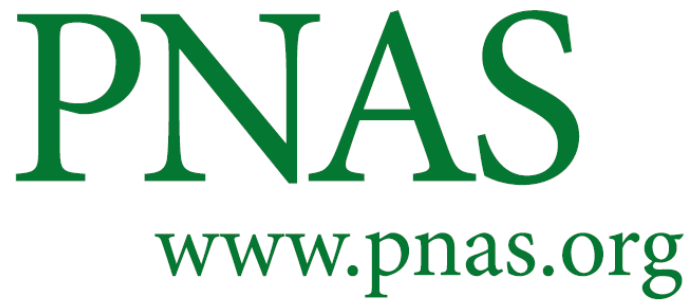

Supplementary Information for

**Activating KRAS, NRAS, and BRAF Mutants Enhance Proteasome Capacity and Reduce Endoplasmic Reticulum Stress in Multiple Myeloma**

Fazal Shirazi, Richard J. Jones, Ram K. Singh, Jianxuan Zou, Iseré Kuitse, Zuzana Berkova, Hua Wang, Hans C. Lee, Samuel Hong, Larry Dick, Nibedita Chattopadhyay, and Robert Z. Orlowski

Corresponding author

Robert Z. Orlowski

Email: rorlowski@mdanderson.org

**This PDF file includes:**

Figures S1 to S19

Tables S1 to S5

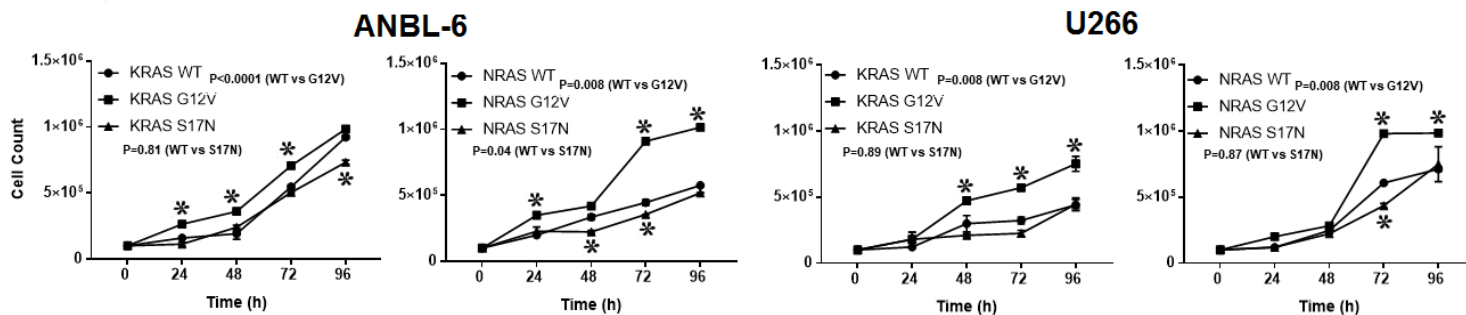

**Supplementary Figure S1. *KRAS* and *NRAS* mutants modulate myeloma cell proliferation.**

ANBL-6 and U266 cells expressing WT *RAS* or the indicated CA and DN mutants were monitored using the WST-1 assay, and data are presented as mean activity  $\pm$  SD relative to vehicle from triplicate experiments, and asterisks indicate  $p \leq 0.05$  in comparison to WT cells.

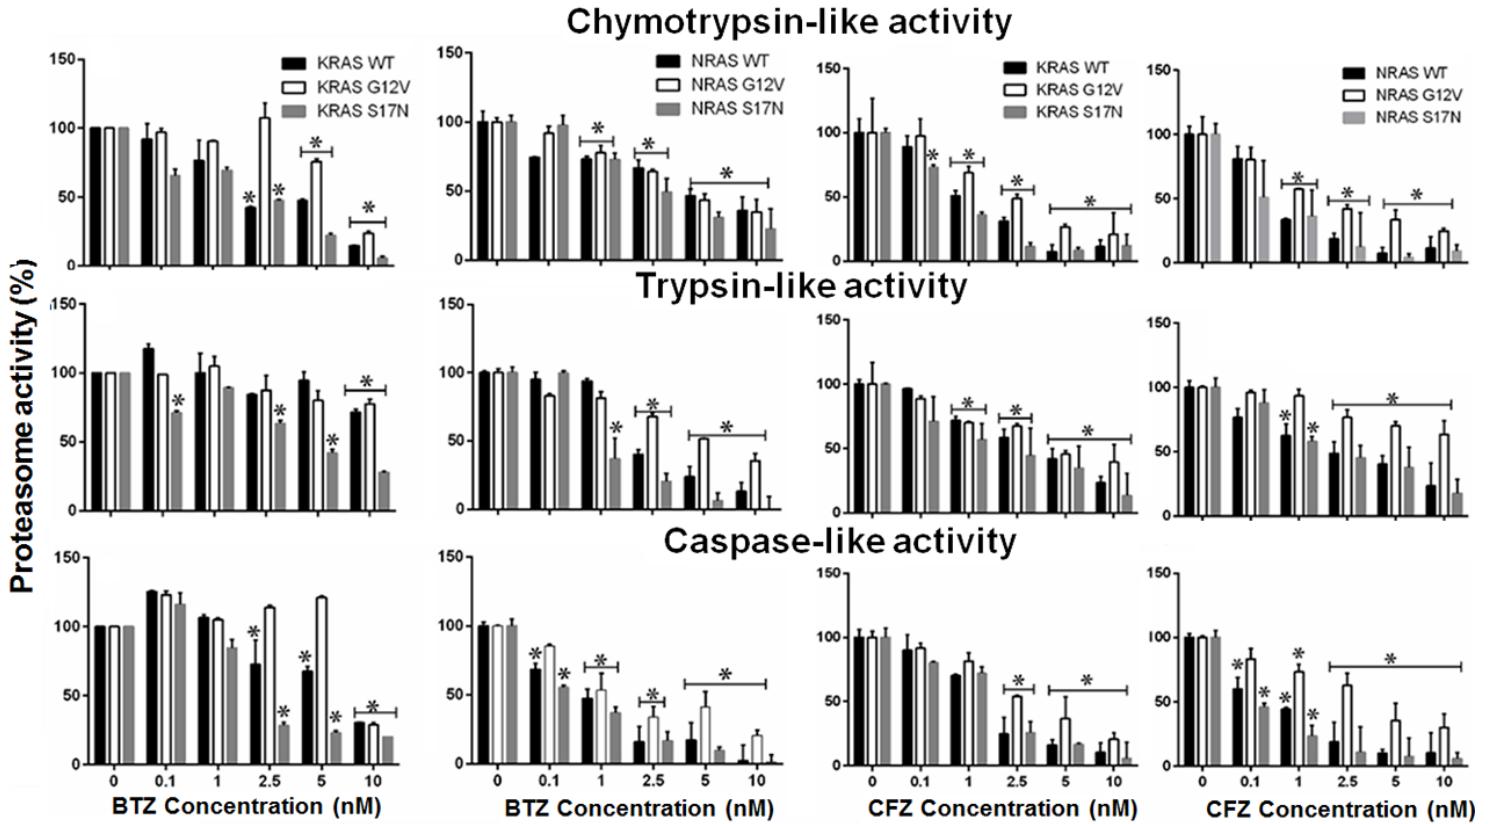

**Supplementary Figure S2. *KRAS* and *NRAS* mutants modulate proteasome activity in ANBL-6 cells treated with bortezomib and carfilzomib.**

ANBL-6 cells expressing WT *RAS* or the indicated CA and DN mutants were exposed to vehicle or a range of concentrations of bortezomib (BTZ) or carfilzomib (CFZ) as indicated. The chymotrypsin-, trypsin- and caspase-like proteasome activities were then measured in lysates using proteasome activity-specific fluorogenic substrates. Data are presented as mean activity  $\pm$  SD relative to vehicle from triplicate experiments, and asterisks indicate  $p \leq 0.05$  in comparison to WT cells.

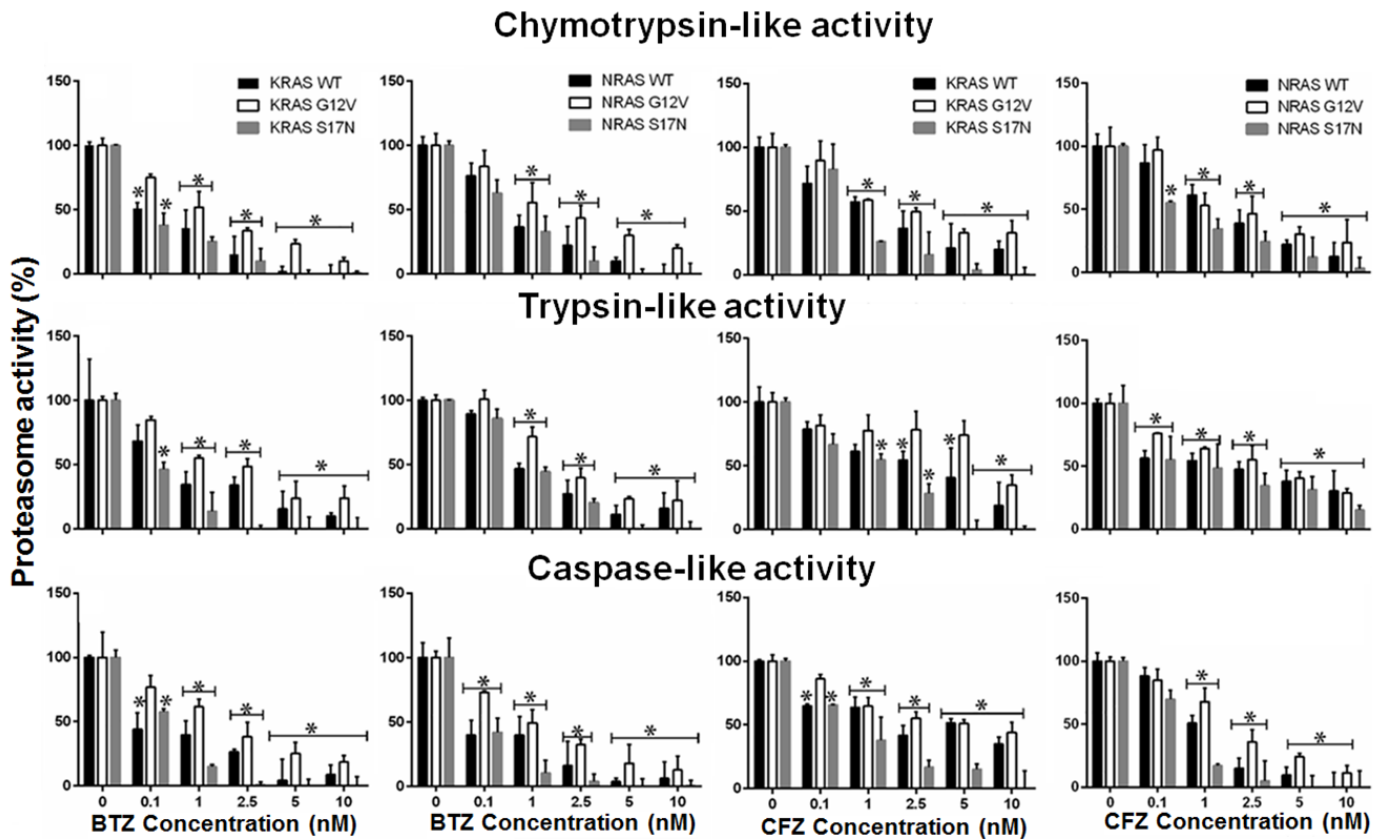

**Supplementary Figure S3. *KRAS* and *NRAS* mutants modulate proteasome activity in U266 cells treated with bortezomib and carfilzomib.**

U266 cells expressing WT *RAS* or the indicated CA and DN mutants were exposed to vehicle or a range of concentrations of bortezomib (BTZ) or carfilzomib (CFZ) as indicated. The chymotrypsin-, trypsin- and caspase-like proteasome activities were then measured in lysates using proteasome activity-specific fluorogenic substrates. Data are presented as mean activity  $\pm$  SD relative to vehicle from triplicate experiments, and asterisks indicate  $p \leq 0.05$  in comparison to WT cells.

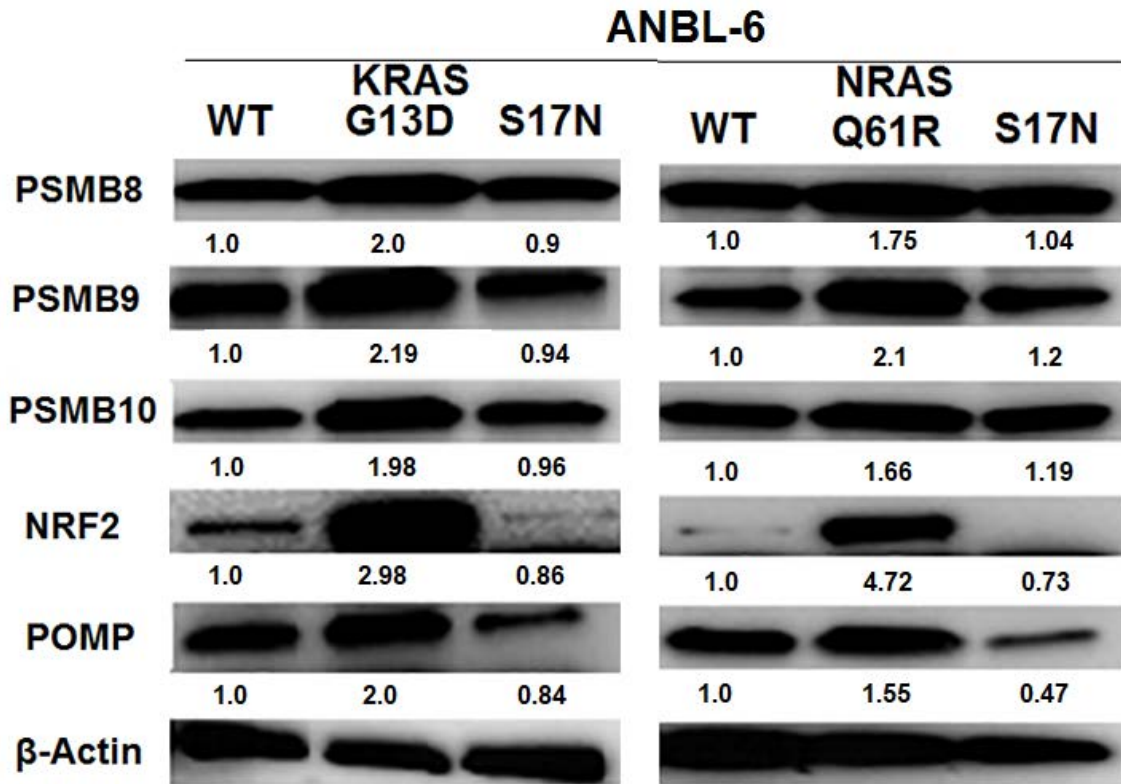

**Supplementary Figure S4. Impact of additional *KRAS* and *NRAS* mutants on proteasome activity-related proteins in ANBL-6 cells.**

Protein extracts from ANBL-6 cells expressing the indicated *RAS* mutants were analyzed for the levels of POMP, NRF2, PSMB8, PSMB9, and PSMB10 proteins by immunoblotting with  $\beta$ -Actin as a loading control. Densitometry of the Western blots was performed using Image J software, and data are shown which were generated first by normalizing all bands to  $\beta$ -Actin. Then, the G13D and Q61R mutants were evaluated in relationship to the WT controls, which were arbitrarily set to 1.0, and a representative set of blots is shown from one of two independent experiments.

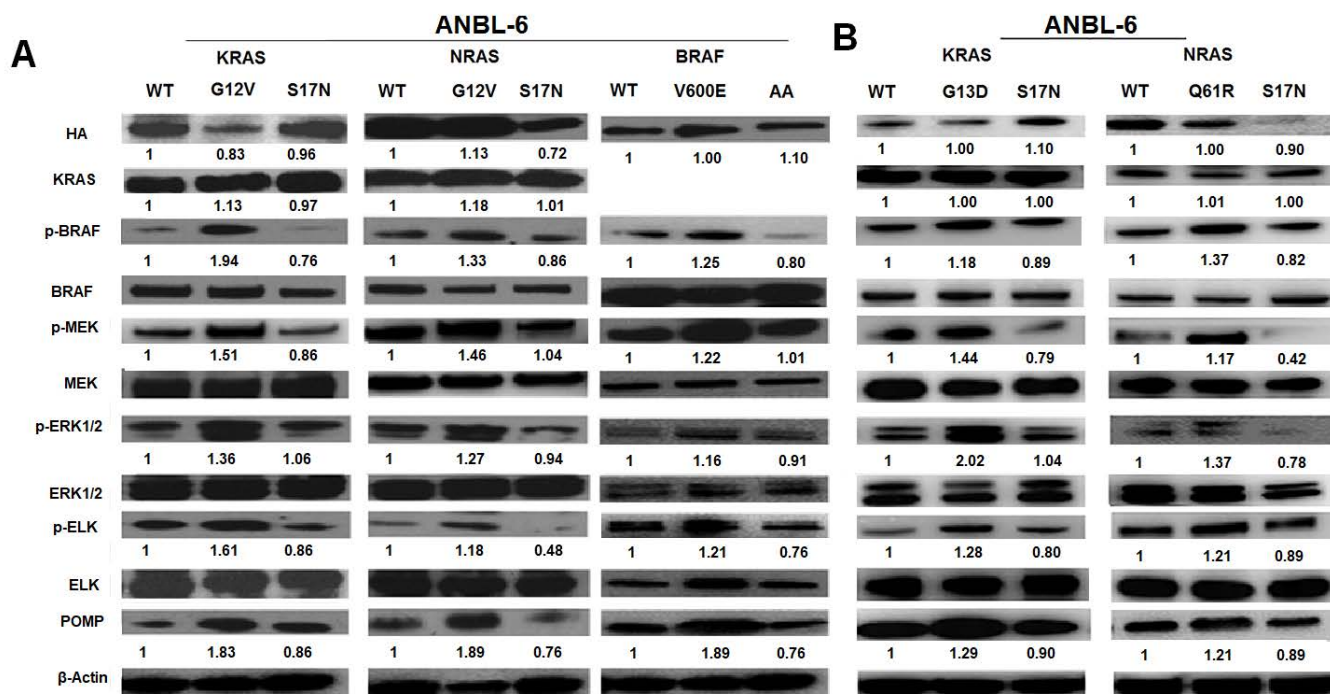

**Supplementary Figure S5. Constitutively active ANBL-6 RAS mutants activate downstream signaling intermediates.**

ANBL-6 cells expressing WT, G12V, or S17N RAS mutants, or WT, V600E, or AA BRAF mutants were analyzed by Western blotting (**A**) for the activation status of MAPK pathway intermediates. A similar approach was taken to compare ANBL-6 cells expressing either the CA KRAS G13D or NRAS Q61R (**B**) mutants to their DN or WT controls. Densitometry was performed and is represented as detailed above.

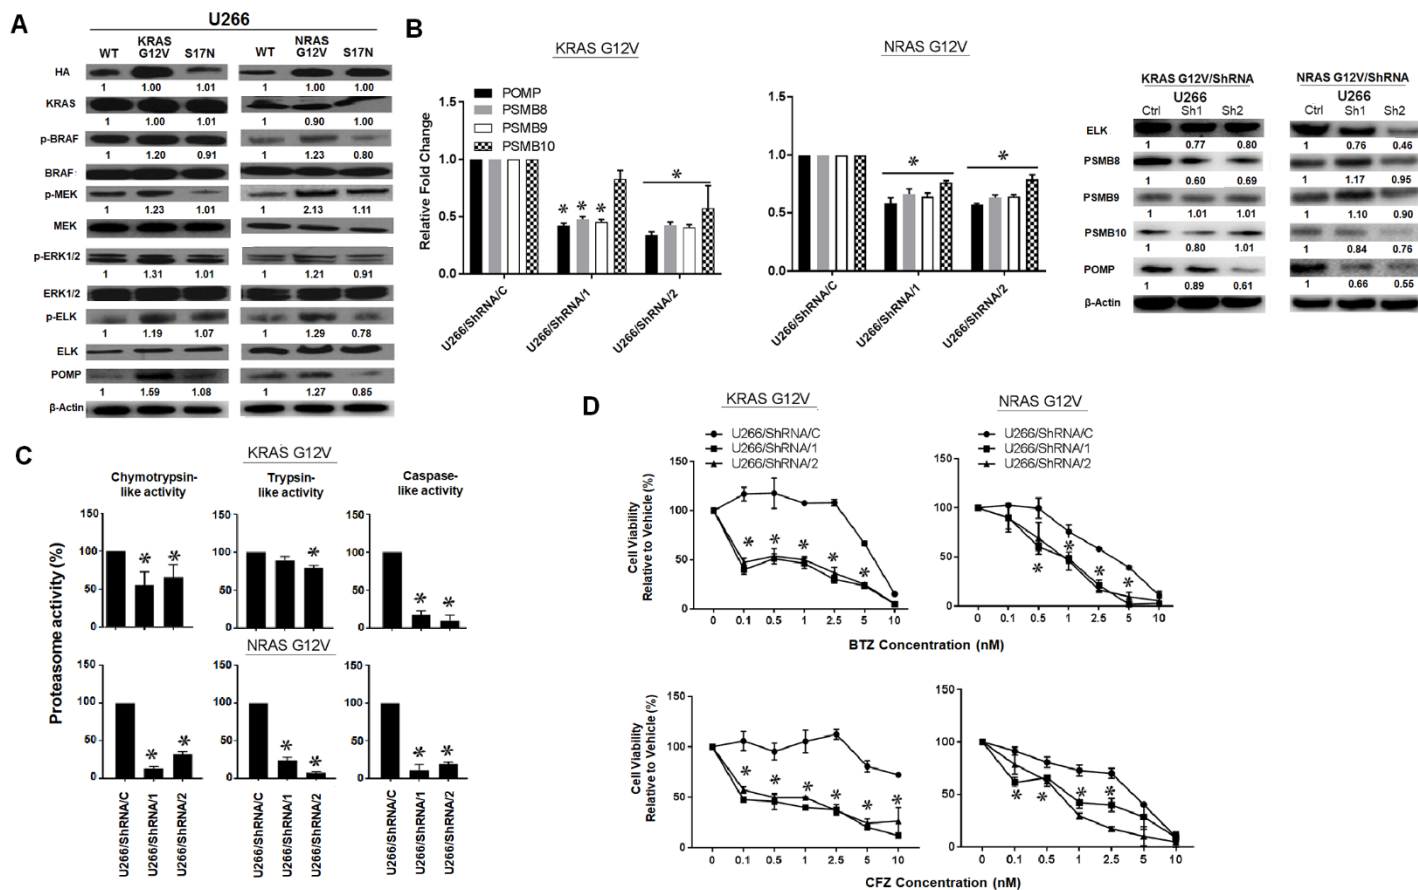

**Supplementary Figure S6. Constitutively active *RAS* mutants activate downstream signaling and proteasome capacity in an *ELK1*-dependent fashion.**

U266 cells expressing WT, G12V, or S17N *RAS* mutants were analyzed by Western blotting (A) for the activation status of MAPK pathway intermediates. Knockdown of *ELK1* by either of two different shRNAs (B) produced a reduction of mRNAs for *POMP*, *PSMB8*, *PSMB9*, and *PSMB10* in U266 cells, and also in the abundance of their respective proteins. *ELK1* suppression produced a reduction (C) in the proteasome chymotrypsin-, trypsin- and caspase like activities in both cells. This reduction was associated with enhanced sensitivity (D) to both bortezomib (upper panel) and carfilzomib (lower panel).

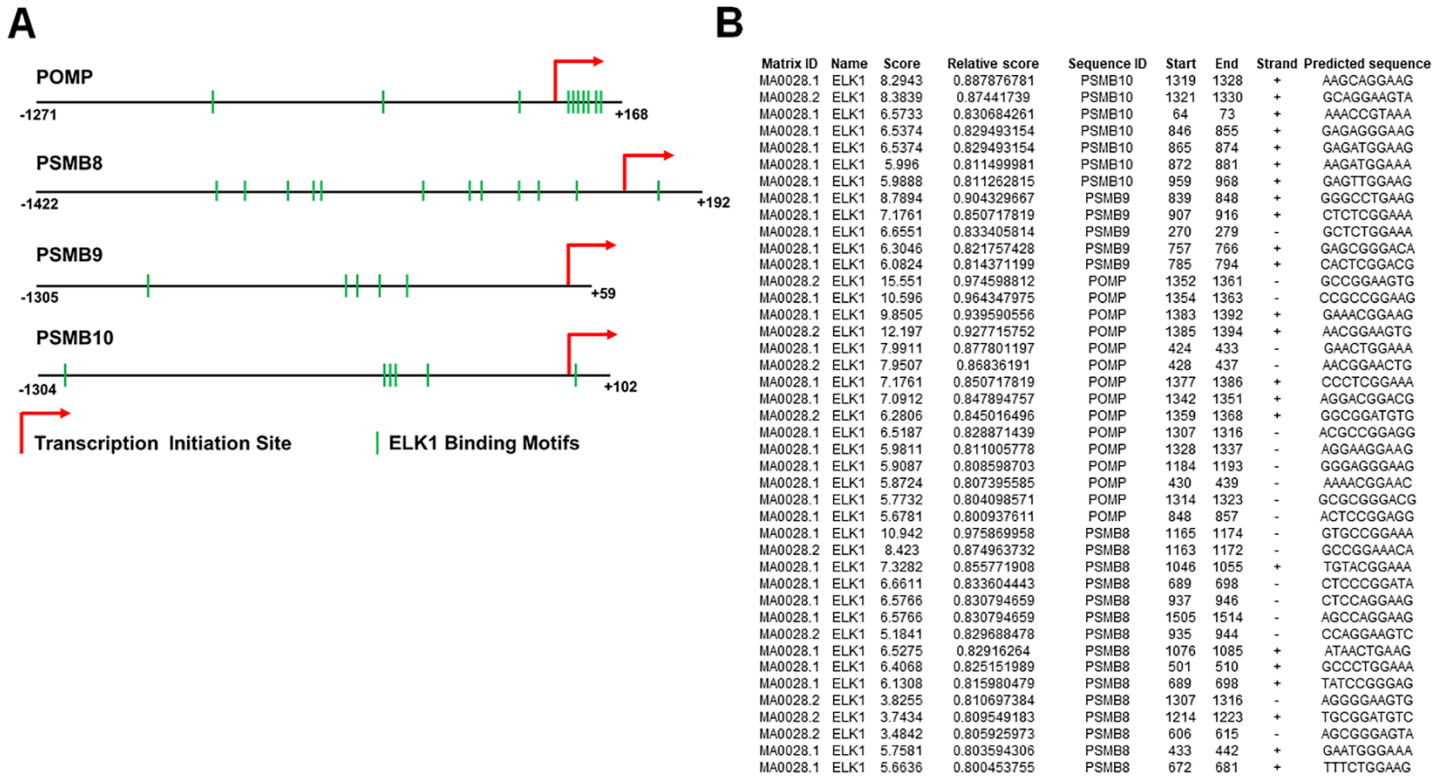

**Supplementary Figure S7. ELK1 binding sites in key promoter regions.**

Putative ELK1 binding sites in the promoters of *POMP*, *PSMB8*, *PSMB9*, and *PSMB10* are shown (A). Their locations were identified through an analysis utilizing JASPAR, which also assigned relative binding scores of ELK1 for these sites (B).



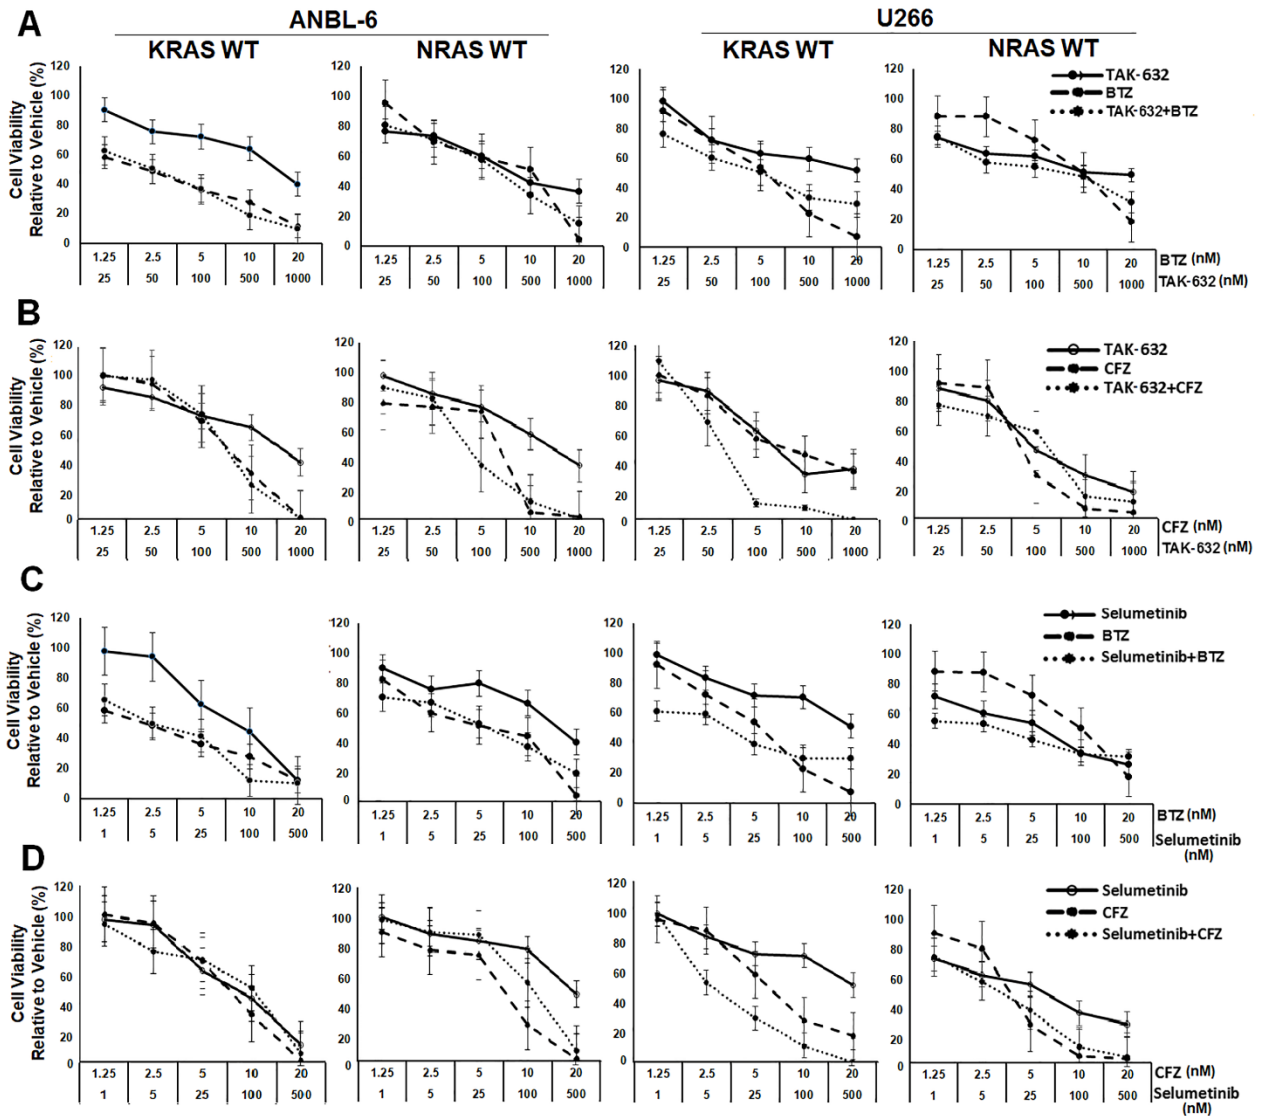

**Supplementary Figure S8. Bortezomib with TAK-632 or selumetinib, and carfilzomib with TAK-632 or selumetinib, in myeloma cells over-expressing WT RAS.**

ANBL-6 (left two columns) and U266 cells (right two columns) expressing WT RAS were incubated with the pan-RAF inhibitor TAK 632, bortezomib (BTZ), or the combination (A), and cellular viability was determined after 72 hour incubation. Data were collected from triplicate experiments and are plotted as the mean viability  $\pm$  SD, while combination indices are provided in Supplementary Tables S3 and S4. Carfilzomib was also combined with TAK-632 in these same cell lines (B), and the data were collected, analyzed, and presented as detailed earlier. Next, either bortezomib (C) or carfilzomib (D) were added to selumetinib, and the data were collected, analyzed, and presented as detailed earlier.

**A****U266**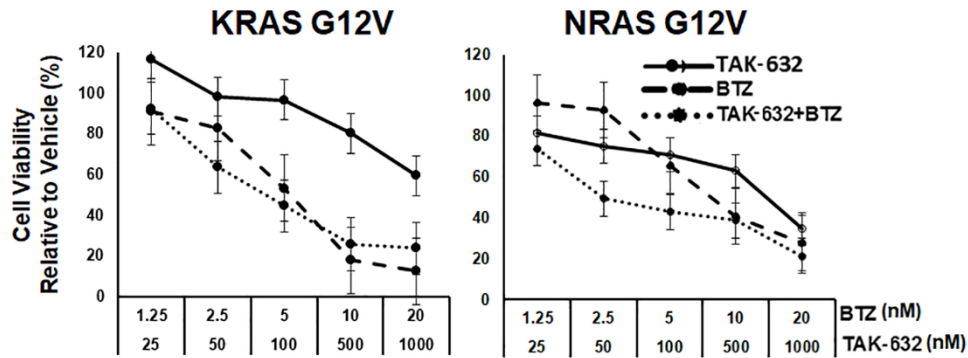**B**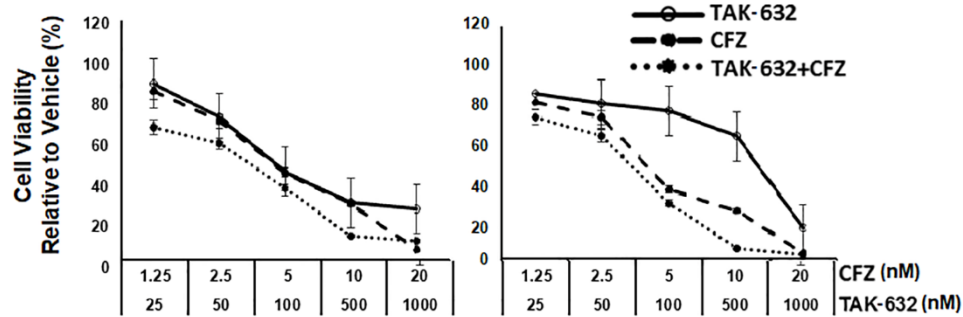**C**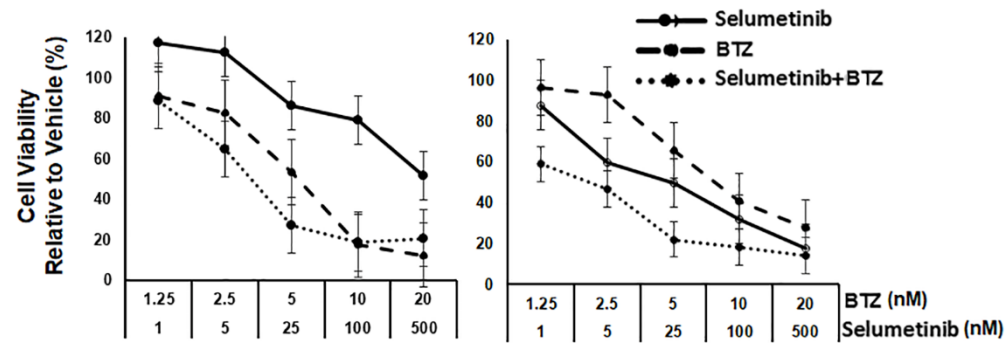**D**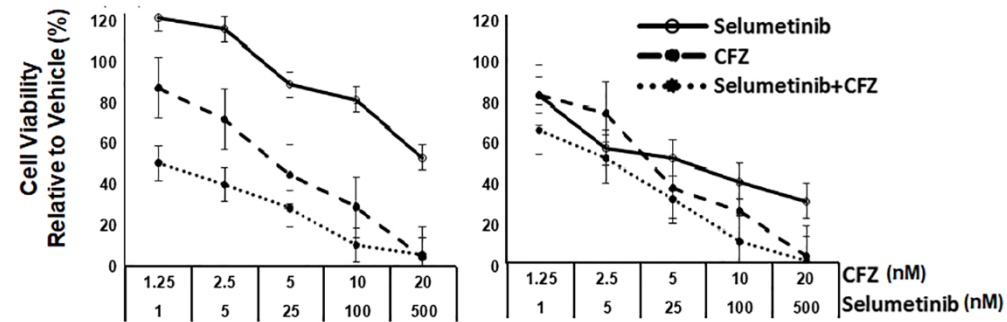

**Supplementary Figure S9. TAK-632 with bortezomib or carfilzomib, or selumetinib with bortezomib or carfilzomib, in U266 cells over-expressing CA RAS.**

U266 cells expressing CA G12V *KRAS* (left column) or G12V *NRAS* (right column) mutants were incubated with the pan-RAF inhibitor TAK-632, bortezomib (BTZ), or the combination (**A**), and cellular viability was determined after 72-hour incubations. Data were collected from triplicate experiments and are plotted as the mean viability  $\pm$  SD, while combination indices are provided in Supplementary Tables S3 and S4. Carfilzomib was also combined with TAK-632 in this cell line (**B**), and the data were collected, analyzed, and presented as detailed earlier. Next, either bortezomib (**C**) or carfilzomib (**D**) were added to selumetinib, and the data were collected, analyzed, and presented as detailed earlier.

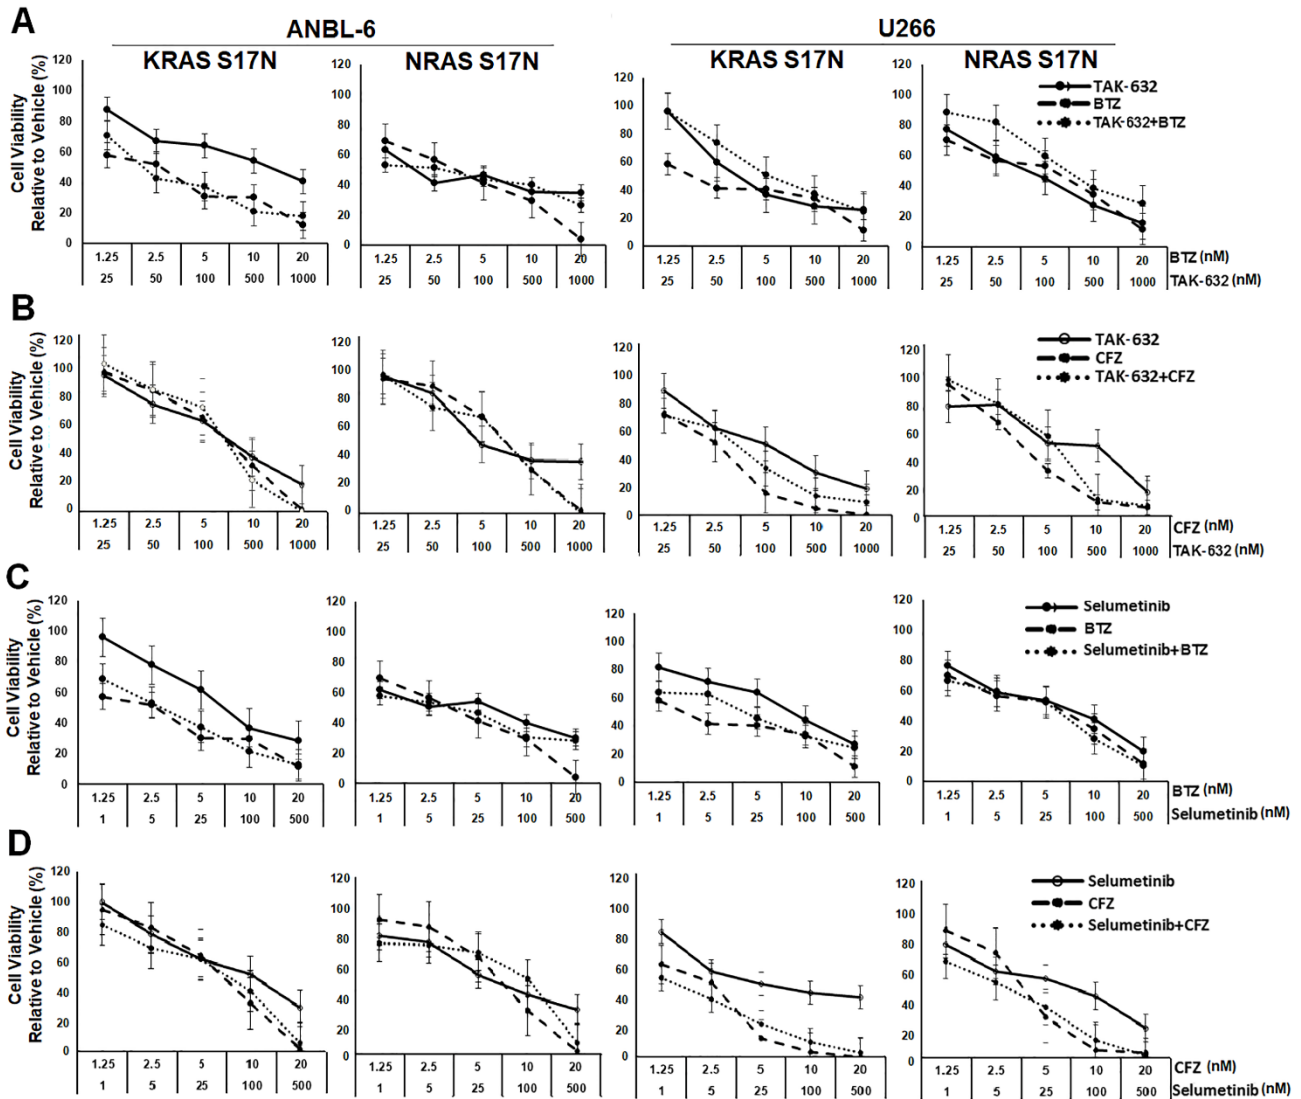

**Supplementary Figure S10. TAK-632 with bortezomib or carfilzomib, or selumetinib with bortezomib or carfilzomib, in myeloma cells over-expressing DN RAS.**

ANBL-6 (left two columns) and U266 cells (right two columns) expressing DN RAS variants as indicated were incubated with the pan-RAF inhibitor TAK-632, bortezomib (BTZ), or the combination (A), and cellular viability was determined after 72 hour incubations. Data were collected from triplicate experiments and are plotted as the mean viability  $\pm$  SD, while combination indices are provided in Supplementary Tables S3 and S4. Carfilzomib was also combined with TAK-632 in these same cell lines (B), and the data were collected, analyzed, and presented as detailed earlier. Next, either bortezomib (C) or carfilzomib (D) were added to selumetinib, and the data were collected, analyzed, and presented as detailed earlier.

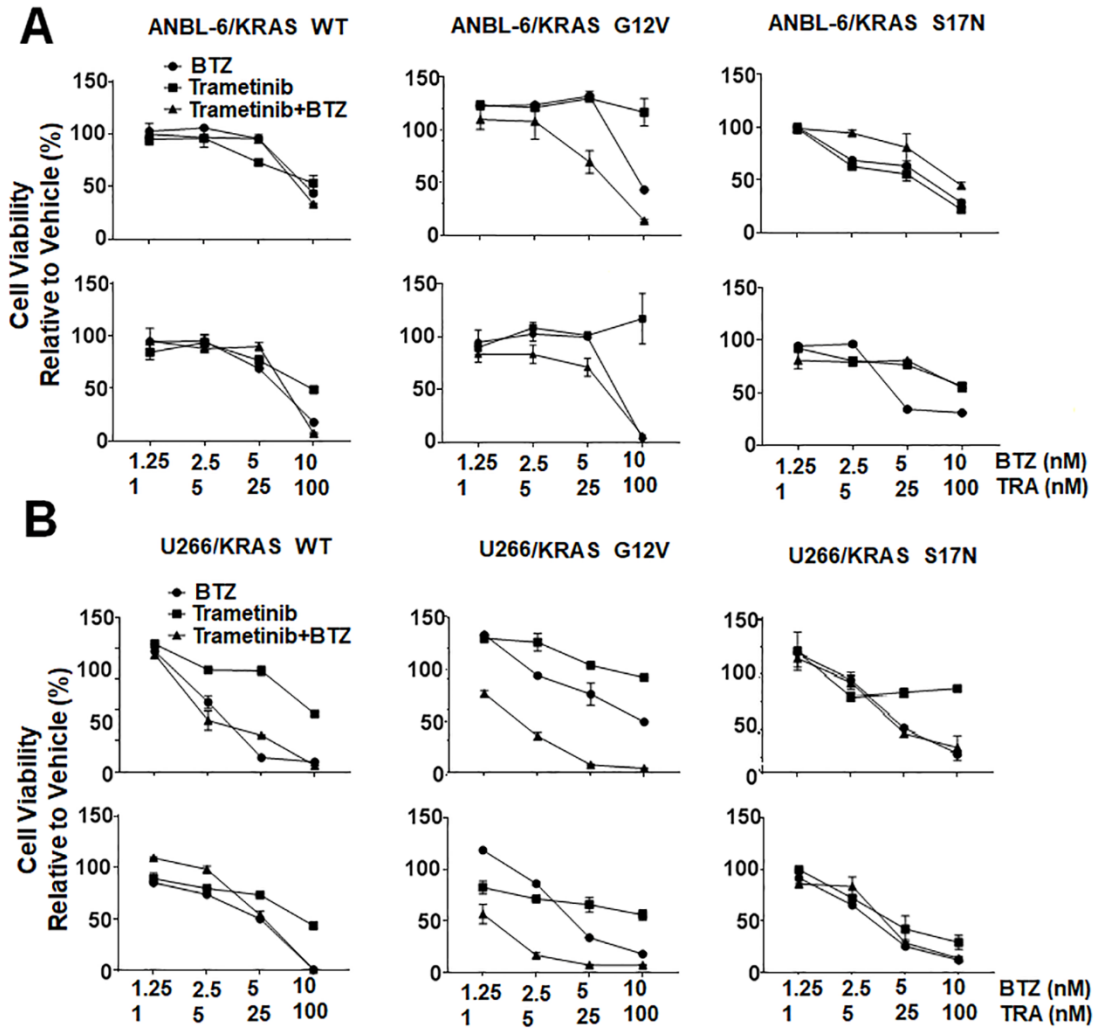

**Supplementary Figure S11. Bortezomib with trametinib in myeloma cells overexpressing WT, CA and DN RAS.**

ANBL-6 (A) and U266 cells (B) expressing WT, CA G12V and DN S17N *KRAS* mutants were incubated with the MEK inhibitor trametinib (TRA), bortezomib (BTZ), or the combination, and cellular viability was determined after 72-hour incubations. Data were collected from triplicate experiments and are plotted as the mean viability  $\pm$  SD, while combination indices are provided in Supplementary Table S5.

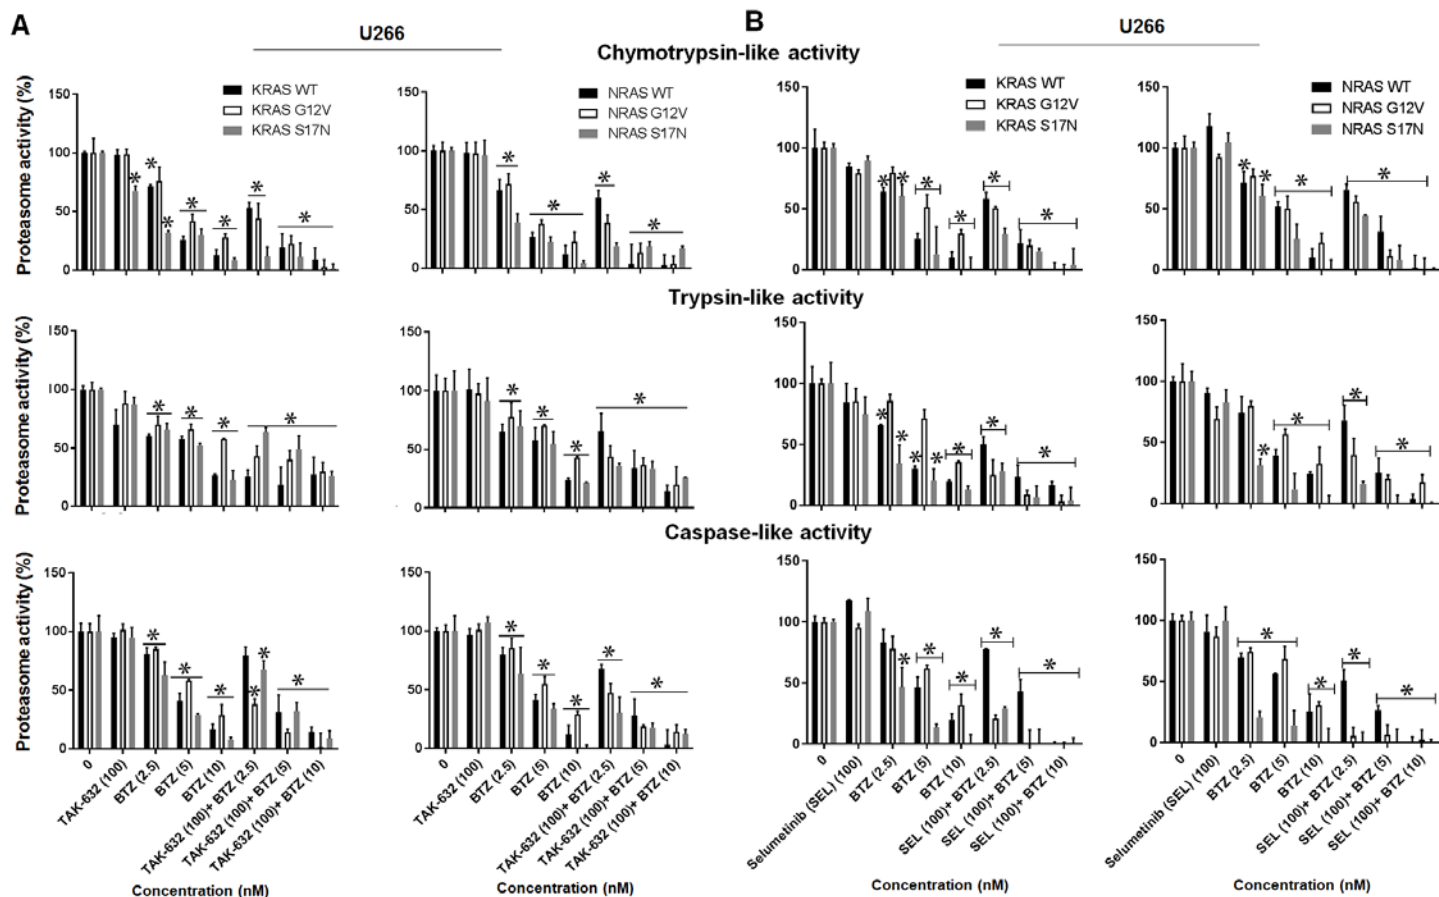

**Supplementary Figure S12. Bortezomib with TAK-632 or selumetinib and proteasome inhibition in myeloma cells.**

The chymotrypsin-, trypsin- and caspase-like proteasome activities were measured in lysates from U266 (A) expressing the indicated *RAS* mutants that had been treated with the indicated concentrations of TAK-632, bortezomib (BTZ), or both. These activities were then measured in U266 (B) with the indicated concentrations of selumetinib (SEL), BTZ, or both. Incubations were for 24-hours in all of the panels, and data are presented as the mean  $\pm$  SD of triplicates.

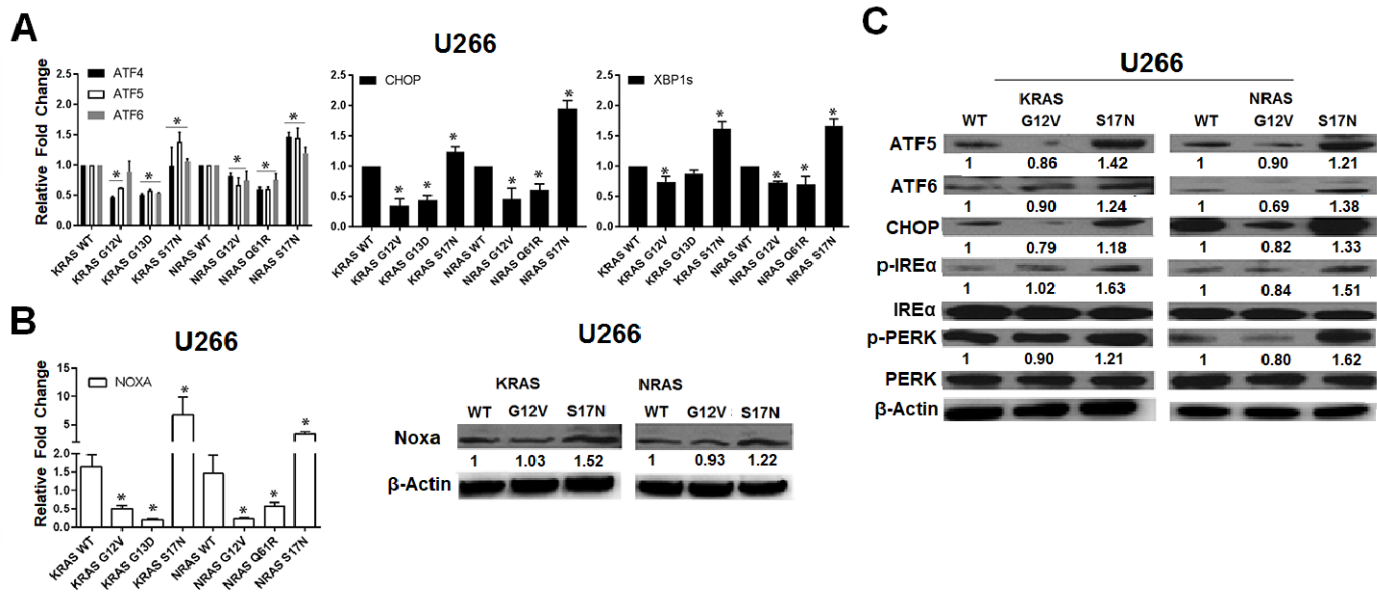

**Supplementary Figure S13. Constitutively active *KRAS*, *NRAS* and *BRAF* mutants attenuate the unfolded protein response.**

Expression of the UPR-related genes *ATF4*, *ATF5*, *ATF6*, *CHOP*, and spliced *XBP1* at the mRNA levels was assessed by qRT-PCR in U266 cells (**A**) expressing the indicated *KRAS* and *NRAS* mutants. NOXA mRNA expression levels were then assessed by qRT-PCR (**B**; **left panel**) and by Western blotting (**B**; **right panel**) in U266 cells. Lysates from U266 cells expressing *KRAS* and *NRAS* mutants were analyzed for the levels of the UPR proteins ATF5, ATF6, CHOP, and phosphorylation/activation of UPR receptors IRE $\alpha$  and PERK (**C**) by immunoblotting.

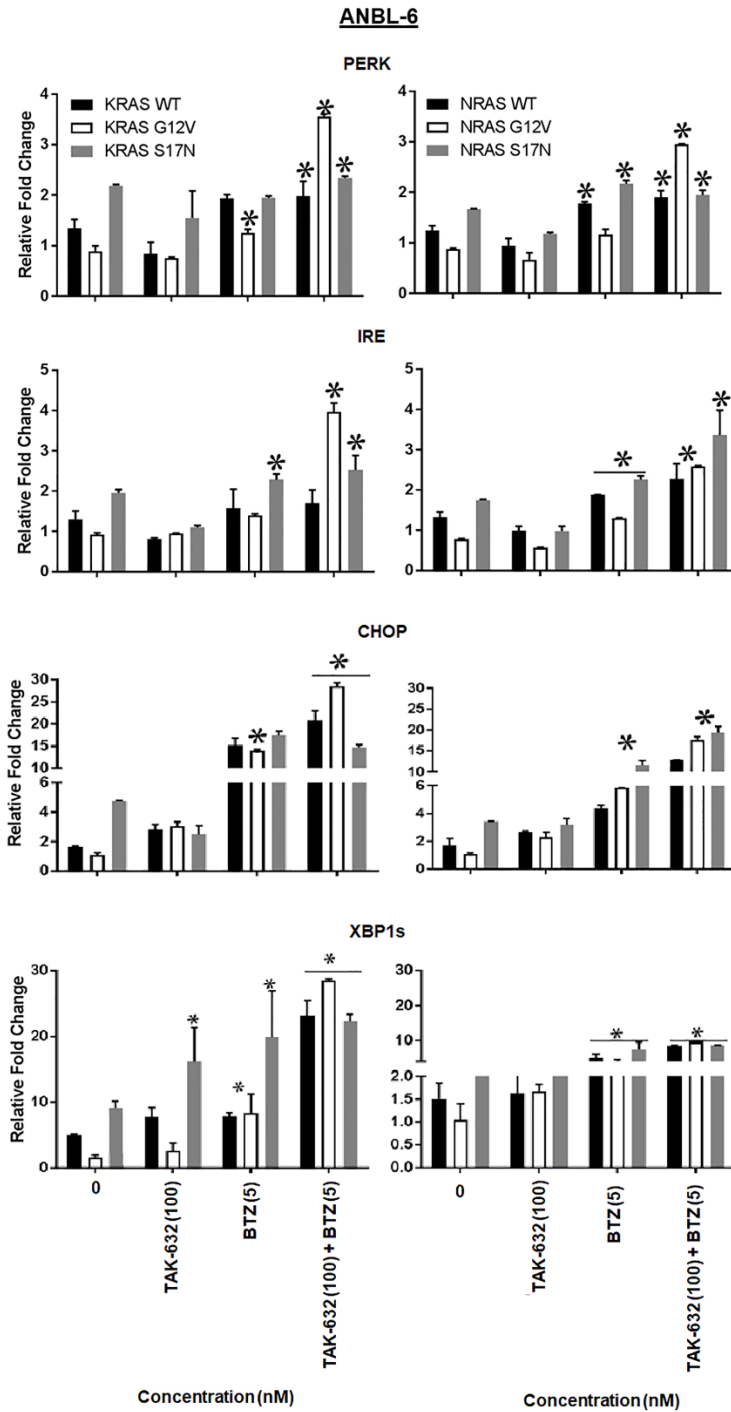

**Supplementary Figure S14. KRAS and NRAS mutants and the unfolded protein response in the setting of drug therapies.**

Transcription of *PERK*, *IRE1 $\alpha$* , *CHOP*, and *XBP1s* in ANBL-6 cells exposed to vehicle, TAK-632, bortezomib, or the combination was evaluated by qPCR, and data were analyzed and are displayed as detailed earlier.



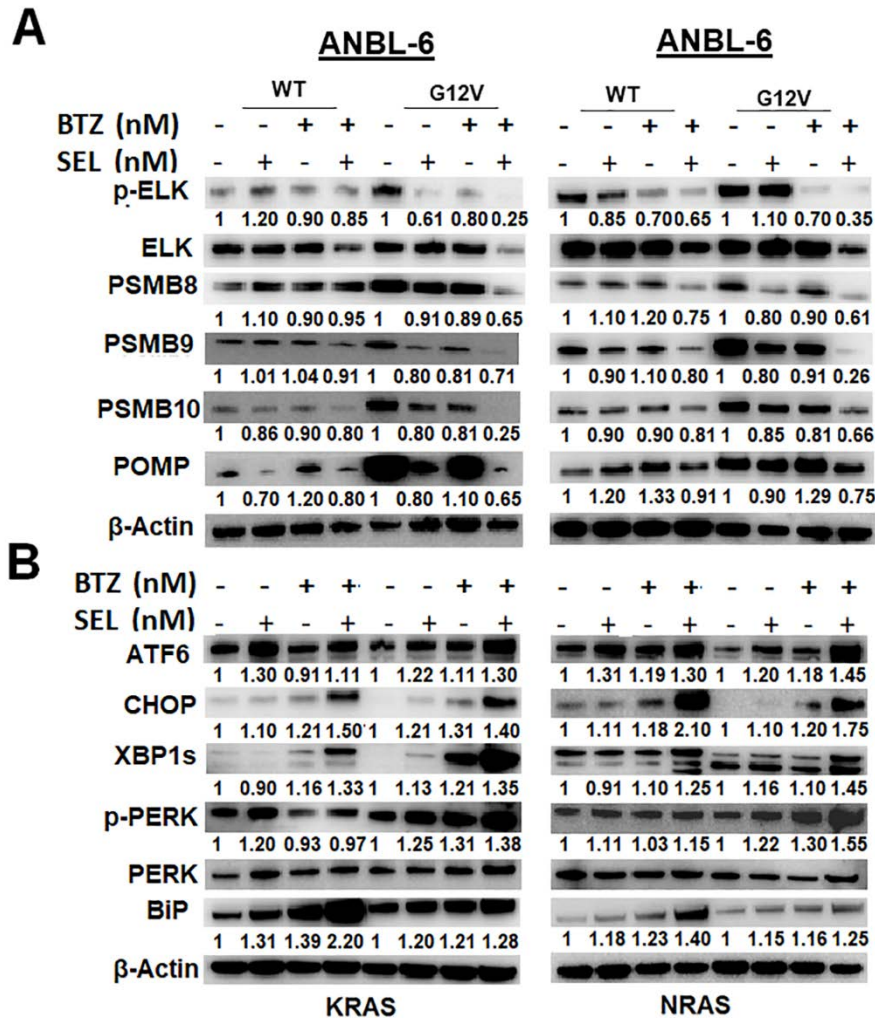

**Supplementary Figure S15. *KRAS* and *NRAS* mutants and the unfolded protein response in the setting of drug therapies.**

ANBL-6 cells expressing the indicated WT and G12V CA *KRAS* and *NRAS* mutations were exposed to bortezomib or selumetinib. Extracts were probed for the expression and activation status of ELK1, and for the expression levels of POMP and the three immunoproteasome subunits (**A**). These same extracts were then probed for the abundance of UPR gene products (**B**), including ATF6, CHOP, spliced XBP-1, PERK and BiP.

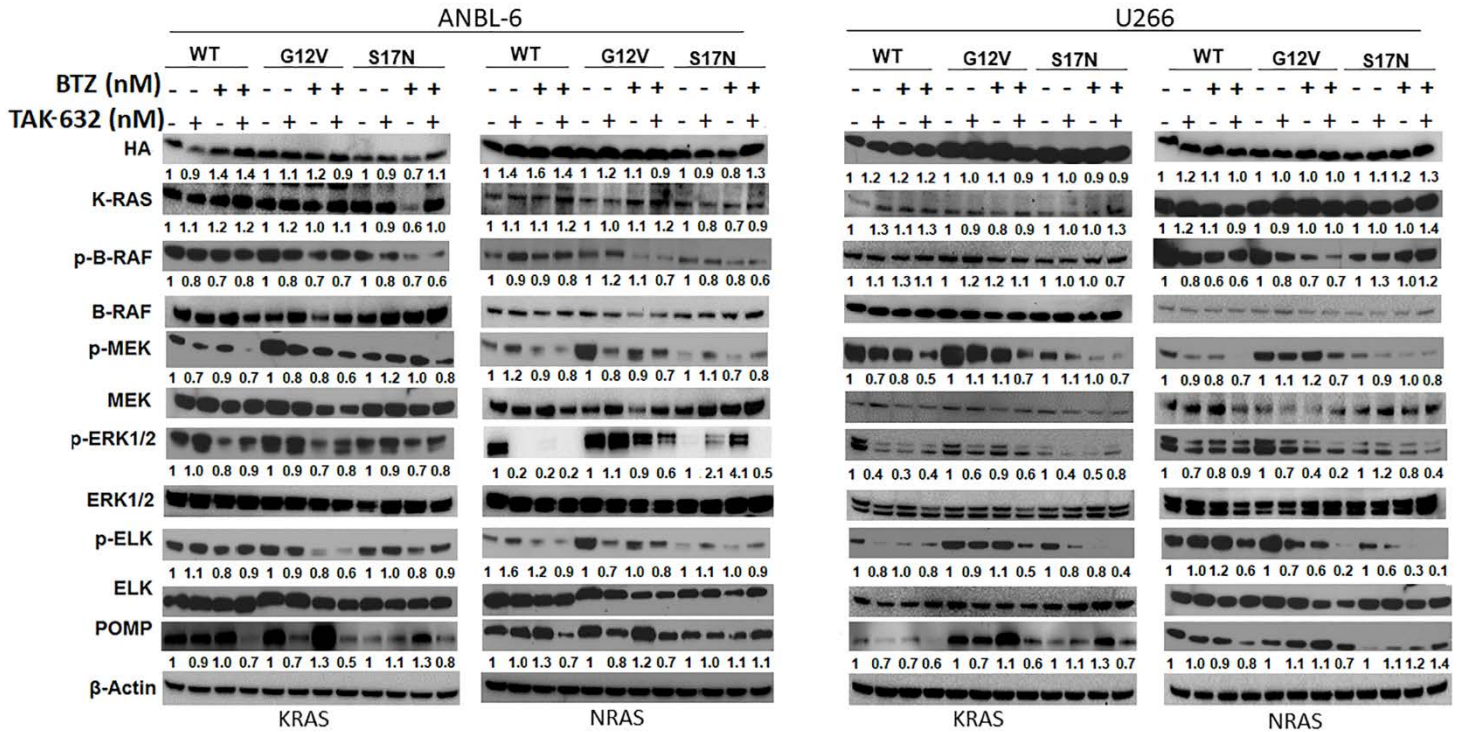

**Supplementary Figure S16. *KRAS* and *NRAS* mutants and downstream signaling in the setting of drug therapies.**

ANBL-6 and U266 cells expressing the indicated WT, CA, and DN *KRAS* and *NRAS* mutations were exposed to bortezomib, TAK-632, or the combination. Extracts were then probed for the expression and activation status of ELK1, for the expression levels of POMP and for multiple intermediate signaling proteins.

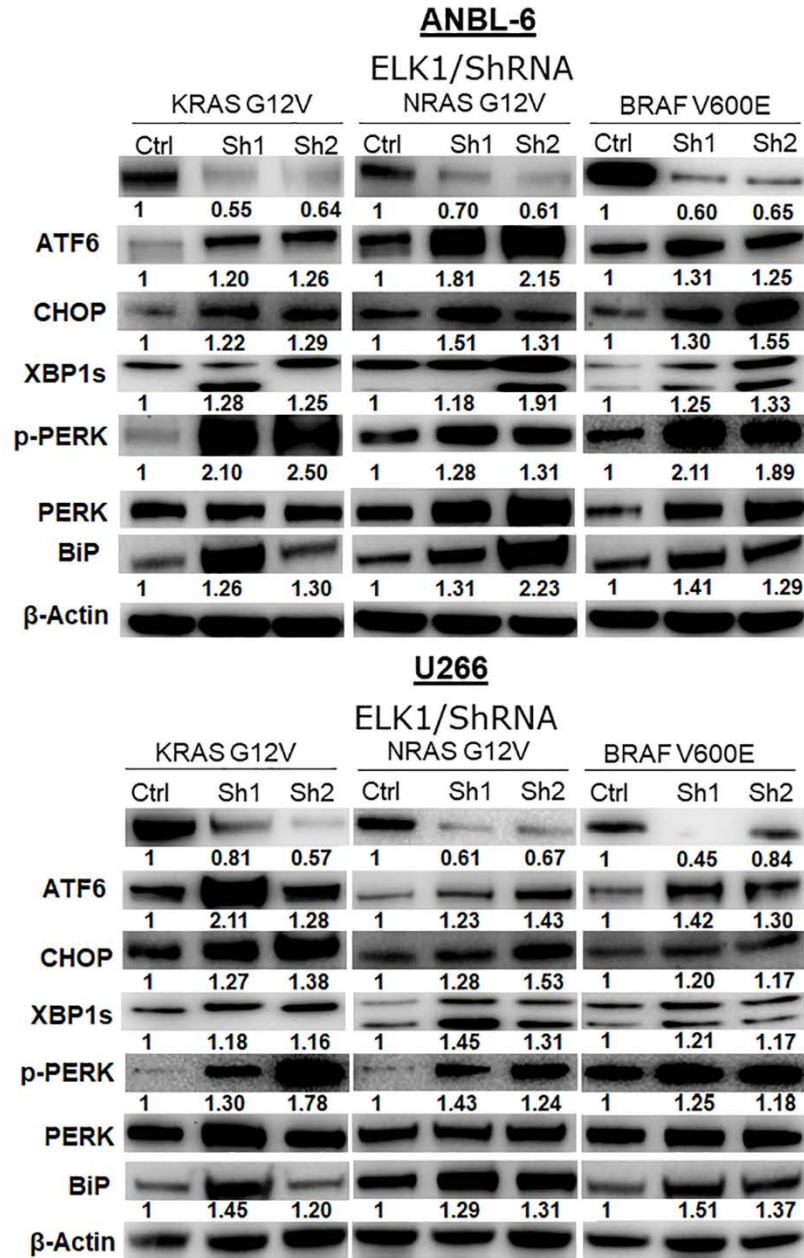

**Supplementary Figure S17. Suppression of *ELK1* and its impact on UPR protein levels.**

ANBL-6 (top panel) and U266 cells (bottom panel) cells expressing WT, CA, or DN *ELK1* variants were evaluated by Western blotting for the levels of UPR pathway intermediates.

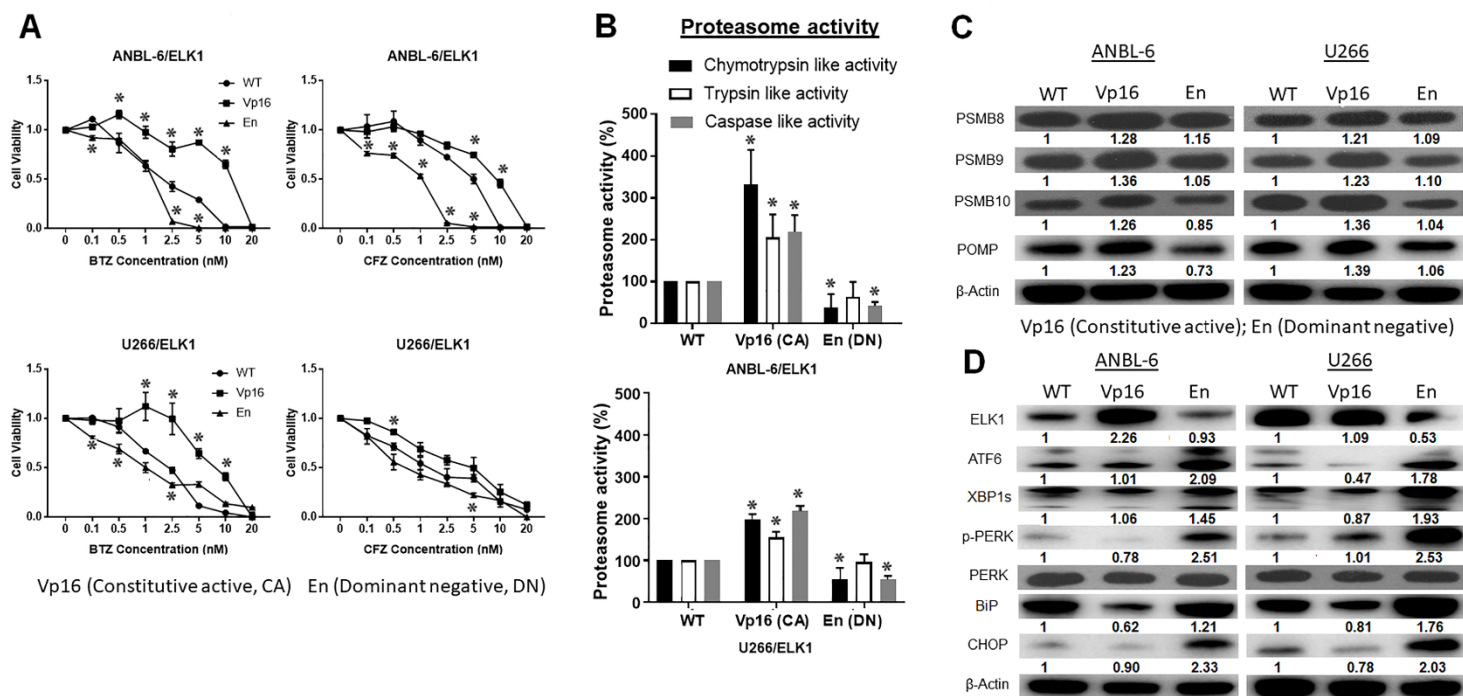

**Supplementary Figure S18. Impact of CA (Vp16) and DN (En) *ELK1* mutants on cell viability, proteasome capacity, and the UPR.**

ANBL-6 (upper panel) and U266 cells (lower panel) expressing WT, CA, or DN *ELK1* mutants were analyzed for their cell viability (**A**) after treatment with BTZ (top row) or CFZ (bottom row). Proteasome chymotrypsin-, trypsin- and caspase-like activities were then evaluated (**B**) in both cell lines. Expression levels of POMP and the immunoproteasome subunits were then examined by Western blotting (**C**), and their impact on UPR proteins was probed as well (**D**).

## Human IgE Levels

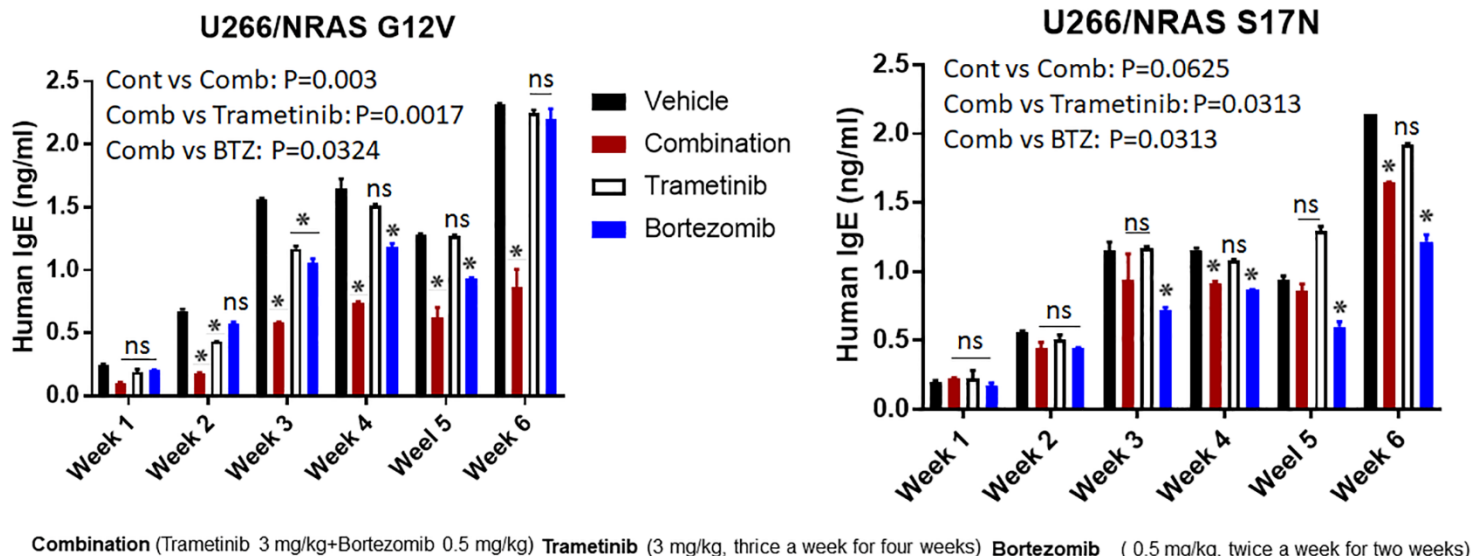

### Supplementary Figure S19. Biochemical disease parameters in mice harboring U266 based cells with CA or DN *RAS* and treated with drug regimens.

Serum drawn from mice at the indicated time points was evaluated for the concentration of human IgE secreted by U266 cells in xenografts with either a CA or DN *NRAS* after treatment with vehicle, bortezomib, trametinib, or the combination. Data are presented as the mean  $\pm$  SD of triplicates with asterisks indicating  $p < 0.05$  when compared to the vehicle controls.

**Supplementary Table S1.** Primers used in the study

| <b>Name</b>                              | <b>Sequence</b>                                                                                                                            |
|------------------------------------------|--------------------------------------------------------------------------------------------------------------------------------------------|
| <b>Site directed mutagenesis primers</b> |                                                                                                                                            |
| KRAS<br>G13D                             | FORWARD CTTGTGGTAGTTGGAGCTGGTGACGTAGGCAAGAGTGCCTTGACG<br>REVERSE CGTCAAGGCACTCTTGCCTACGTCACCAGCTCCAACCTACCACAAG                            |
| NRAS<br>Q61R                             | FORWARD CTCATGGCACTGTACTCTTCTCTTCCAGCTGTATCCAGTATGTCCAACAAACAG<br>REVERSE CTGTTTGTGGACATACTGGATACAGCTGGAAGAGAAGAGTACAGTGCCATGAG            |
| Braf                                     | FORWARD ACCTGGCTCACTAACTAACG<br>REVERSE GGCACTCTGCCATTAATCTC                                                                               |
| ELK1                                     | FORWARD GCTCTAGAGCCACC ATGGACCCATCTGTGACGCTGTGGCAGTTT<br>REVERSE CTAGCTAGCTAGTTACTTGTGCATCGTCGTCCTTGTAGTC<br>TGGCTTCTGGGGCCCTGGGGAGAGCA    |
| ELK1-<br>VP16                            | FORWARD GCTCTAGAGCCACC ATGGACCCATCTGTGACGCTGTGGCAGTTT<br>REVERSE CTAGCTAGCTAGTTACTTGTGCATCGTCGTCCTTGTAGTC<br>CCCACCGTACTCGTCAATTCCAAGGGCAT |
| ELK1-<br>EN                              | FORWARD GCTCTAGAGCCACC ATGGACCCATCTGTGACGCTGTGGCAGTTT<br>REVERSE CTAGCTAGCTAGTTA CTTGTGCATCGTCGTCCTTGTAGTCGGATCCC                          |
| <b>Syber green primers used</b>          |                                                                                                                                            |
| sXBP1                                    | CTGAGTCCGAATCAGGTGCAG<br>ATCCATGGGGAGATGTTCTGG                                                                                             |
| usXBP1                                   | CAGCACTCAGACTACGTGCA<br>ATCCATGGGGAGATGTTCTGG                                                                                              |
| Total<br>XBP1                            | TGGCCGGGTCTGCTGAGTCCG<br>ATCCATGGGGAGATGTTCTGG                                                                                             |

**Supplementary Table S2: Primary antibodies**

| <b>Target Protein</b> | <b>Species</b> | <b>Clone<br/>(Target)</b> | <b>Manufacturer</b>  | <b>Cat#</b> |
|-----------------------|----------------|---------------------------|----------------------|-------------|
| ATF5                  | Rabbit         | H-83                      | Santa Cruz           | Sc-99205    |
| ATF6                  | Mouse          | F-7                       | Santa Cruz           | Sc-166659   |
| B-Raf                 | Rabbit         | 55C6                      | Cell Signaling       | 9433        |
| p-B-Raf               | Rabbit         | S445                      | Cell Signaling       | 2696        |
| CHOP                  | Mouse          | B-3                       | Santa Cruz           | Sc-7351     |
| ELK                   | Rabbit         |                           | Cell Signaling       | 9182        |
| p-ELK                 | Rabbit         | S383                      | Cell Signaling       | 9181        |
| IRE $\alpha$          | Rabbit         | 14C10                     | Cell Signaling       | 3294        |
| p-IRE $\alpha$        | Rabbit         |                           | Abcam                | ab48187     |
| HA                    | Rabbit         | Y-11                      | Santa Cruz           | Sc-805      |
| KRAS                  | Rabbit         | C-terminal                | Abgent               | AP16005b    |
| MEK1/2                | Rabbit         |                           | Cell Signaling       | 9122        |
| p-MEK1/2              | Rabbit         | S217/221                  | Cell Signaling       | 9154        |
| p44/42 MAPK           | Rabbit         | 137F5                     | Cell Signaling       | 4695        |
| p-p44/42 MAPK         | Rabbit         | T202/Y204                 | Cell Signaling       | 4370        |
| NRF2                  | Rabbit         | EP1809Y                   | Abcam                | ab76026     |
| NRAS                  | Rabbit         | C-terminal                | Thermo<br>Scientific | PA5-14833   |
| Noxa                  | Rabbit         |                           | Abcam                | ab36833     |
| POMP                  | Rabbit         | D2x9s                     | Cell Signaling       | 15141       |
| PERK                  | Rabbit         | D11A8                     | Cell Signaling       | 5683        |
| p-PERK                | Rabbit         | T980                      | Cell Signaling       | 3179        |
| PSMB8                 | Rabbit         | D1K7X                     | Cell Signaling       | 13635       |
| PSM9                  | Rabbit         | EPR13785                  | Abcam                | ab184172    |
| PSM10                 | Rabbit         | EPR14902                  | Abcam                | ab183506    |
| p53                   | Rabbit         | DO-1                      | Santa Cruz           | Sc-126      |

**Supplementary Table S3.** CI index values for TAK-632+BTZ/CFZ in ANBL-6 and U266 cells

| Combination Dosage | TAK-632 (nM) | BTZ/CFZ (nM) | ANBL-6      |             | U266        |             |
|--------------------|--------------|--------------|-------------|-------------|-------------|-------------|
|                    |              |              | CI with BTZ | CI with CFZ | CI with BTZ | CI with CFZ |
| KRAS WT            |              |              |             |             |             |             |
| 1                  | 25           | 1.25         | 1.13        | 1.50        | <b>0.66</b> | <b>0.95</b> |
| 2                  | 50           | 2.5          | 1.21        | 1.94        | <b>0.78</b> | <b>0.64</b> |
| 3                  | 100          | 5            | 1.18        | 1.99        | <b>0.92</b> | <b>0.39</b> |
| 4                  | 500          | 10           | 0.78        | 1.00        | 1.71        | <b>0.57</b> |
| KRAS G12V          |              |              |             |             |             |             |
| 1                  | 25           | 1.25         | 1.11        | <b>0.80</b> | 1.35        | <b>0.80</b> |
| 2                  | 50           | 2.5          | <b>0.58</b> | <b>0.93</b> | <b>0.68</b> | 1.02        |
| 3                  | 100          | 5            | <b>0.59</b> | <b>0.89</b> | <b>0.84</b> | <b>0.86</b> |
| 4                  | 500          | 10           | 1.63        | <b>0.8</b>  | 1.01        | <b>0.94</b> |
| KRAS S17N          |              |              |             |             |             |             |
| 1                  | 25           | 1.25         | 2.01        | 1.80        | 4.24        | 1.35        |
| 2                  | 50           | 2.5          | 0.85        | 2.00        | 5.45        | 2.05        |
| 3                  | 100          | 5            | 1.27        | 2.53        | 2.97        | 1.87        |
| 4                  | 500          | 10           | 0.96        | 1.81        | 3.89        | 2.14        |
| NRAS WT            |              |              |             |             |             |             |
| 1                  | 25           | 1.25         | 1.99        | 1.41        | 2.12        | 1.03        |
| 2                  | 50           | 2.5          | 1.78        | 2.75        | <b>0.54</b> | 1.15        |
| 3                  | 100          | 5            | 1.65        | <b>0.53</b> | <b>0.88</b> | 2.24        |
| 4                  | 500          | 10           | 1.96        | 1.14        | 1.59        | 1.56        |
| NRAS G12V          |              |              |             |             |             |             |
| 1                  | 25           | 1.25         | 1.43        | <b>0.44</b> | 1.03        | <b>0.89</b> |
| 2                  | 50           | 2.5          | 0.53        | <b>0.97</b> | <b>0.28</b> | 1.00        |
| 3                  | 100          | 5            | 0.61        | <b>0.84</b> | <b>0.46</b> | <b>0.90</b> |
| 4                  | 500          | 10           | 0.88        | 2.02        | <b>0.84</b> | <b>0.54</b> |
| NRAS S17N          |              |              |             |             |             |             |
| 1                  | 25           | 1.25         | 1.14        | 1.41        | 7.22        | 2.52        |
| 2                  | 50           | 2.5          | 1.99        | 1.33        | 7.20        | 3.05        |
| 3                  | 100          | 5            | 2.01        | 2.07        | 3.75        | 2.30        |
| 4                  | 500          | 10           | 4.33        | 1.95        | 4.20        | 1.08        |

\*CI Values 01-0.3: very strong synergism; 0.3-0.7: synergism; 0.7-0.9: moderate to slight synergism; 0.9-1.1: additive; 1.1-1.45: moderate to slight antagonism; 1.45-3.3: antagonism; 3.3->10: strong to very strong antagonism (Chou TC. Synergism and Antagonism in Chemotherapy, Academic Press, San Diego, CA, 1991, pp. 61-102; Chou TC. Pharmacol Rev 58:621-681, 2006)



**Supplementary Table S4.** CI index values for Selumetinib+BTZ/CFZ in ANBL-6 and U266 cells

| Combination Dosage | Selumetinib (nM) | BTZ/CFZ (nM) | ANBL-6      |             | U266        |             |
|--------------------|------------------|--------------|-------------|-------------|-------------|-------------|
|                    |                  |              | CI with BTZ | CI with CFZ | CI with BTZ | CI with CFZ |
| KRAS WT            |                  |              |             |             |             |             |
| 1                  | 1                | 1.25         | 1.24        | <b>0.81</b> | <b>0.33</b> | 1.93        |
| 2                  | 5                | 2.5          | 1.18        | <b>0.83</b> | <b>0.65</b> | <b>0.62</b> |
| 3                  | 25               | 5            | 1.73        | 2.02        | <b>0.83</b> | <b>0.82</b> |
| 4                  | 100              | 10           | 0.56        | 3.22        | 1.33        | 1.00        |
| KRAS G12V          |                  |              |             |             |             |             |
| 1                  | 1                | 1.25         | <b>0.89</b> | <b>0.57</b> | <b>0.86</b> | <b>0.30</b> |
| 2                  | 5                | 2.5          | <b>0.71</b> | <b>0.58</b> | <b>0.69</b> | <b>0.47</b> |
| 3                  | 25               | 5            | <b>0.91</b> | <b>0.70</b> | <b>0.52</b> | <b>0.70</b> |
| 4                  | 100              | 10           | 1.09        | 1.69        | <b>0.79</b> | <b>0.67</b> |
| KRAS S17N          |                  |              |             |             |             |             |
| 1                  | 1                | 1.25         | 1.56        | <b>0.59</b> | 1.33        | <b>0.67</b> |
| 2                  | 5                | 2.5          | 1.43        | <b>0.86</b> | 2.67        | 1.38        |
| 3                  | 25               | 5            | 1.38        | 1.17        | 2.10        | 1.67        |
| 4                  | 100              | 10           | 1.02        | 2.57        | 2.01        | 2.83        |
| NRAS WT            |                  |              |             |             |             |             |
| 1                  | 1                | 1.25         | 0.45        | 2.62        | <b>0.24</b> | 1.65        |
| 2                  | 5                | 2.5          | 1.02        | 2.06        | <b>0.66</b> | 1.47        |
| 3                  | 25               | 5            | 1.11        | 4.21        | <b>0.98</b> | 1.58        |
| 4                  | 100              | 10           | 0.85        | 3.21        | 1.33        | 1.57        |
| NRAS G12V          |                  |              |             |             |             |             |
| 1                  | 1                | 1.25         | 2.35        | 1.14        | <b>0.25</b> | <b>0.66</b> |
| 2                  | 5                | 2.5          | <b>0.62</b> | <b>0.78</b> | <b>0.41</b> | <b>0.86</b> |
| 3                  | 25               | 5            | <b>0.60</b> | <b>0.81</b> | <b>0.34</b> | <b>0.90</b> |
| 4                  | 100              | 10           | 1.19        | 1.90        | <b>0.69</b> | <b>0.79</b> |
| NRAS S17N          |                  |              |             |             |             |             |
| 1                  | 1                | 1.25         | <b>0.92</b> | <b>0.77</b> | <b>0.98</b> | <b>0.77</b> |
| 2                  | 5                | 2.5          | 1.76        | 1.12        | 1.66        | 1.06        |
| 3                  | 25               | 5            | 2.41        | 5.33        | 2.92        | 1.36        |
| 4                  | 100              | 10           | 2.16        | 4.33        | 1.41        | 1.25        |

\*CI Values 01-0.3: very strong synergism; 0.3-0.7: synergism; 0.7-0.9: moderate to slight synergism; 0.9-1.1: additive; 1.1-1.45: moderate to slight antagonism; 1.45-3.3: antagonism; 3.3->10: strong to very strong antagonism (Chou TC. Synergism and Antagonism in Chemotherapy, Academic Press, San Diego, CA, 1991, pp. 61-102; Chou TC. Pharmacol Rev 58:621-681, 2006)

**Supplementary Table S5.** CI index values for Trametinib+BTZ in ANBL-6 and U266 cells

| Combination Dosage | Trametinib (nM) | BTZ (nM) | ANBL-6          | U266            |
|--------------------|-----------------|----------|-----------------|-----------------|
|                    |                 |          | Trametinib +BTZ | Trametinib +BTZ |
| KRAS WT            |                 |          |                 |                 |
| 1                  | 1               | 1.25     | 2.61            | 1.39            |
| 2                  | 5               | 2.5      | 2.25            | 0.88            |
| 3                  | 25              | 5        | 4.18            | 1.32            |
| 4                  | 100             | 10       | <b>0.31</b>     | <b>0.91</b>     |
| KRAS G12V          |                 |          |                 |                 |
| 1                  | 1               | 1.25     | 1.43            | <b>0.25</b>     |
| 2                  | 5               | 2.5      | 1.74            | <b>0.19</b>     |
| 3                  | 25              | 5        | <b>0.92</b>     | <b>0.09</b>     |
| 4                  | 100             | 10       | <b>0.23</b>     | <b>0.10</b>     |
| KRAS S17N          |                 |          |                 |                 |
| 1                  | 1               | 1.25     | 3.21            | 3.01            |
| 2                  | 5               | 2.5      | 3.51            | 1.31            |
| 3                  | 25              | 5        | 2.87            | 1.07            |
| 4                  | 100             | 10       | 4.85            | 1.35            |
| NRAS WT            |                 |          |                 |                 |
| 1                  | 1               | 1.25     | 1.99            | 1.67            |
| 2                  | 5               | 2.5      | 1.78            | 2.89            |
| 3                  | 25              | 5        | 1.65            | 2.29            |
| 4                  | 100             | 10       | 1.96            | <b>0.71</b>     |
| NRAS G12V          |                 |          |                 |                 |
| 1                  | 1               | 1.25     | <b>0.03</b>     | <b>0.29</b>     |
| 2                  | 5               | 2.5      | <b>0.02</b>     | <b>0.28</b>     |
| 3                  | 25              | 5        | <b>0.05</b>     | <b>0.39</b>     |
| 4                  | 100             | 10       | <b>0.48</b>     | <b>0.78</b>     |
| NRAS S17N          |                 |          |                 |                 |
| 1                  | 1               | 1.25     | <b>0.54</b>     | <b>0.95</b>     |
| 2                  | 5               | 2.5      | <b>0.89</b>     | 2.08            |
| 3                  | 25              | 5        | 2.21            | 1.34            |
| 4                  | 100             | 10       | 2.43            | 2.02            |

\*CI Values 01-0.3: very strong synergism; 0.3-0.7: synergism; 0.7-0.9: moderate to slight synergism; 0.9-1.1: additive; 1.1-1.45: moderate to slight antagonism; 1.45-3.3: antagonism; 3.3->10: strong to very strong antagonism (Chou TC. Synergism and Antagonism in Chemotherapy, Academic Press, San Diego, CA, 1991, pp. 61-102; Chou TC. Pharmacol Rev 58:621-681, 2006)
